# Supplementary material
Source: PubMed Central journal article supplement (PMC10764281)
Supplement: NIHMS1802668-supplement-Supporting_Table_1.pdf [file NIHMS1802668-supplement-Supporting_Table_1.pdf]

**Supporting Table 1: Cohort 3 Post-Induction Therapy and Disease Response**

| Therapy Sequence                                                                                 | Pt (n) | Number of Treatment Cycles (number of patients)                                       | End-Induction Overall INRC Response <sup>1</sup> | Post-Induction Overall INRC Response <sup>1</sup> | Event Y/N | Death Y/N |
|--------------------------------------------------------------------------------------------------|--------|---------------------------------------------------------------------------------------|--------------------------------------------------|---------------------------------------------------|-----------|-----------|
| DIT, MIBG                                                                                        | 1      | DIT: 2<br>MIBG: 1                                                                     | MR: 1                                            | MR: 1                                             | 1/0       | 1/0       |
| I/T, MIBG, NANT 2009-03 (I/T/alisertib), pembro, DIT, radiation, dinutuximab, radiation, surgery | 1      | I/T: 2<br>MIBG: 1<br>I/T/alisertib: 4<br>Pembro: 28<br>DIT: 4<br>Dinutuximab: Unknown | SD: 1                                            | PR: 1                                             | 1/0       | 0/1       |
| DIT, surgical resection, MIBG, NANT2013-01 (Dinituximab with NK cells), RA                       | 1      | DIT: 4<br>Dinutuximab and NK cells: 4<br>RA: unknown                                  | MR: 1                                            | MR: 1                                             | 0/1       | 0/1       |
| MIBG, DIT, and radiation                                                                         | 1      | MIBG: 1<br>DIT: 14                                                                    | PR: 1                                            | PR: 1                                             | 1/0       | 0/1       |
| MIBG, HU 3F8 antibody with GM-CSF, bivalent vaccine and oral beta glucan                         | 1      | MIBG: 2<br>HU 3F3: unknown                                                            | MR: 1                                            | PR: 1                                             | 0/1       | 0/1       |
| I/T, MIBG, NANT 2009-03 (alisertib and I/T), ADVL1213 (ontuxizumab; MORAb-004)                   | 1      | I/T: 3<br>MLN8237 I/T: 2<br>Ontuxizumab: 3                                            | PR: 1                                            | PR: 1                                             | 1/0       | 0/1       |
| MIBG, Crizotinib                                                                                 | 1      | MIBG: 2<br>Crizotinib: 2                                                              | MR: 1                                            | MR: 1                                             | 1/0       | 0/1       |
| MIBG, Crizotinib, DIT                                                                            | 1      | MIBG:<br>Crizotinib: 3<br>DIT: 2                                                      | PR: 1                                            | MR: 1                                             | 1/0       | 1/0       |
| I/T, MIBG                                                                                        | 1      | I/T: 2<br>MIBG: 2                                                                     | MR: 1                                            | MR: 1                                             | 1/0       | 1/0       |
| Cyclo/Topo, MIBG, ADVL0918 (I/T, temsirolimus), Cyclo/Topo                                       | 1      | Cyclo/Topo: 1<br>MIBG: 1<br>Cyclo/Topo: 6                                             | MR: 1                                            | CR: 1                                             | 0/1       | 0/1       |
| DIT                                                                                              | 3      | 1 (n=1)<br>3 (n=1)<br>8 (n=1)                                                         | PR: 1<br>MR: 2                                   | PR: 1<br>PD: 2                                    | 3/0       | 3/0       |

**Supporting Table 1: continued**

| Therapy Sequence                                                     | Pt (n) | Number of Treatment Cycles (number of patients)                     | End-Induction Overall INRC Response <sup>1</sup> | Post-Induction Overall INRC Response <sup>1</sup> | Event Y/N | Death Y/N |
|----------------------------------------------------------------------|--------|---------------------------------------------------------------------|--------------------------------------------------|---------------------------------------------------|-----------|-----------|
| DIT, radiation, DIT, HU 3F8, DFMO                                    | 1      | DIT: 5<br>DIT: 4<br>HU 3F8: 1<br>DFMO: Unknown                      | MR: 1                                            | CR: 1                                             | 0/1       | 0/1       |
| DIT, DFMO                                                            | 1      | DIT: 4<br>DFMO: Unknown                                             | PR: 1                                            | CR: 1                                             | 0/1       | 0/1       |
| DIT, Radiation                                                       | 2      | DIT:<br>3 (n=1)<br>17 (n=1)                                         | PR: 1<br>SD: 1                                   | CR: 1<br>PD: 1                                    | 1/1       | 1/1       |
| DIT, RA                                                              | 1      | DIT: 8<br>RA: 1                                                     | PR: 1                                            | PR: 1                                             | 0/1       | 0/1       |
| DIT, cerlitinib                                                      | 1      | DIT: 8<br>Cerlitinib: 2                                             | MR: 1                                            | PR: 1                                             | 0/1       | 0/1       |
| Crizotinib, zometa/cyclo, cyclo/topo, crizotinib                     | 1      | Crizotinib: 26<br>Zometa/cyclo: 2<br>Cyclo/Topo: 8<br>Crizotinib: 1 | MR: 1                                            | PR: 1                                             | 1/0       | 1/0       |
| Cyclo/Topo                                                           | 1      | 2                                                                   | PR: 1                                            | PD: 1                                             | 1/0       | 0/1       |
| ADVL1213 (ontuxizumab (MORAb-004), nifurtimox, I/T, RA, CAR-T/pembro | 1      | ADVL1213 : Unknown<br>Nifurtimox: 3<br>I/T: 2<br>RA: 2              | PR: 1                                            | PR: 1                                             | 1/0       | 0/1       |
| Irinotecan and bortezomib                                            | 1      | Unknown                                                             | SD:1                                             | PD: 1                                             | 1/0       | 0/1       |
| I/T                                                                  | 2      | 13 (n=1)<br>2 (n=1)                                                 | MR: 1<br>SD: 1                                   | PD: 2                                             | 2/0       | 2/0       |
| Radiation only                                                       | 1      | NA                                                                  | PR: 1                                            | PR: 1                                             | 1/0       | 1/0       |
| HU 3F8, radiation                                                    | 1      | HU 3F8: 5                                                           | PR: 1                                            | PD:1                                              | 1/0       | 0/1       |

Abbreviations: CAR-T, chimeric antigen receptor T cell; CR, complete response; Cyclo/Topo, cytophosphamide and topotecan; DFMO, difluoromethylornithine; DIT, dinutuximab, GD2, disialoganglioside antigen; HU 3F8, humanized 3F8; irinotecan, and temodar; I/T, irinotecan, and temodar; MIBG, meta-iodobenzylguanidine; MR, minimal response; n, number; NK, natural killer; pembro, pembrolizumab; PD, progressive disease; PR, partial response; RA, retinoic acid; SD, stable disease

**Supporting Table 1: continued**

<sup>1</sup>Overall response was determined using two components if bone marrow was not done
